# Supplementary material for: Single-molecule analysis reveals the phosphorylation of FLS2 governs its spatiotemporal dynamics and immunity
Source: eLife journal article supplement (doi:10.7554/elife.91072), 2023-10-17
Supplement: fig1-data2 [file Figure1D---SourceData---Diffusion coeffcient.xlsx]

## Sheet: Sheet1
FLS2	CK	0.00391291	0.00647739	0.00609256	0.0051357	0.00732993	0.01033	0.00998849	0.00419952	0.00415815	0.00521555	0.00575175	0.00642836	0.00521195	0.00776068	0.00594566	0.00540256	0.00571873	0.00389045	0.00484507	0.00584117	0.00884708	0.00522757	0.0112512	0.0075145	0.00561177	0.00287343	0.00494994	0.00236483	0.00247059	0.0037792	0.00460999	0.00283661	0.00489103	0.00297852	0.0048899	0.00570558	0.0108993	0.00327642	0.00249517	0.00527109	0.00273086	0.00282878
	flg22	0.00471846	0.00924485	0.0166112	0.0116654	0.00551188	0.00512153	0.00651178	0.00800018	0.00375578	0.0135706	0.0169512	0.00585194	0.00733669	0.0066896	0.00649681	0.00987416	0.011984	0.00398199	0.00469245	0.00910961	0.0114736	0.00686436
FLS2S938A	CK	0.00699359	0.00777857	0.00691512	0.0051606	0.00462807	0.00657506	0.00670656	0.00659933	0.00727947	0.00429141	0.00645654	0.00966941	0.00704531	0.00521915	0.00591017	0.0088369	0.00347936	0.00387525	0.00442181	0.00323519	0.00328549	0.00408037	0.00667882	0.00682182	0.00894746	0.00588979	0.00468813	0.00385035	0.00490343	0.00527837	0.00435512	0.00626181	0.00759976	0.00693266	0.00507224	0.00468921	0.00447404	0.00502111	0.00377746	0.00450817	0.00412287	0.00649382	0.00311674	0.00452689
	flg22	0.00701778	0.00663896	0.00779471	0.00780728	0.00683439	0.00622014	0.00519757	0.00411908	0.00693745	0.0035229	0.00530884	0.00449366	0.00425598	0.00488315	0.00341036	0.00960727	0.00286484	0.00364586	0.0047819	0.00325612	0.00319521	0.00353671	0.00480065	0.00380277	0.00356697
FLS2S938D	CK	0.00695184	0.00591834	0.00405508	0.00550934	0.00638852	0.00359418	0.00405415	0.00464515	0.00644763	0.00708761	0.00638264	0.00341586	0.00486071	0.00714332	0.0054325	0.00609818	0.00659933	0.00629216	0.00630086	0.00715484	0.00694065	0.00655541	0.00995864	0.00557699	0.00590609	0.00718787	0.00848985
	flg22	0.00895365	0.00794145	0.00790315	0.0108893	0.0123823	0.0112876	0.0102353	0.00742164	0.00608415	0.00576634	0.00859014	0.00553095	0.00911171	0.00947545	0.00895365	0.00787771	0.00838108	0.0111224	0.0100277	0.0089043	0.0145915	0.0105172	0.013938
