# Supplementary material for: Single-molecule analysis reveals the phosphorylation of FLS2 governs its spatiotemporal dynamics and immunity
Source: eLife journal article supplement (doi:10.7554/elife.91072), 2023-10-17
Supplement: fig1-data4 [file Figure1I---SourceData ---Lifetime.xlsx]

## Sheet: Sheet1
		FLS2
		CK					flg22
		0-1S	1-4S	大于4S	Sum		0-1S	1-4S	大于4S	Sum
		0.406413	0.48361	0.109976	1		0.489011	0.418681	0.0923077	1
		0.398773	0.496319	0.104908	1		0.566372	0.379267	0.0543616	1
		0.479598	0.434401	0.0860013	1		0.530686	0.361011	0.108303	1
		0.439214	0.450266	0.11052	1		0.545984	0.381839	0.0721769	1
		0.428287	0.444223	0.12749	1		0.456212	0.452138	0.0916497	1
		0.452543	0.43372	0.113736	1		0.469052	0.419648	0.1113	1
		0.395777	0.486576	0.117647	1		0.427975	0.490605	0.0814196	1
		0.493635	0.409477	0.0968883	1		0.478439	0.416838	0.104723	1
		0.373655	0.51614	0.110205	1		0.375238	0.489524	0.135238	1
		0.403598	0.455282	0.14112	1
		0.417062	0.483412	0.0995261	1
		0.474019	0.422057	0.103924	1
		0.327039	0.528081	0.14488	1
		FLS2S938A
		CK					flg22
		0-1S	1-4S	大于4S	Sum		0-1S	1-4S	大于4S	Sum
		0.487245	0.448342	0.0644133	1		0.532995	0.433164	0.0338409	1
		0.443829	0.456448	0.099723	1		0.405329	0.479592	0.115079	1
		0.428158	0.468714	0.103129	1		0.442413	0.473492	0.0840951	1
		0.435583	0.483348	0.0810692	1		0.489234	0.453349	0.0574163	1
		0.444601	0.449525	0.105874	1		0.44686	0.495169	0.057971	1
		0.421791	0.500539	0.0776699	1		0.594891	0.374088	0.0310219	1
		0.495948	0.41329	0.0907618	1		0.436902	0.469104	0.0939948	1
		0.543536	0.419525	0.0369393	1		0.327149	0.495897	0.176953	1
		0.489837	0.441057	0.0691057	1		0.477921	0.447102	0.074977	1
		0.582996	0.364372	0.0526316	1		0.382542	0.498009	0.119449	1
		0.408935	0.465827	0.125239	1		0.354041	0.516285	0.129674	1
		0.489905	0.4375	0.0725945	1		0.405927	0.482596	0.111477	1
		0.547018	0.424312	0.0286697	1		0.343084	0.501239	0.155677	1
		0.544326	0.406028	0.0496454	1		0.334238	0.513795	0.151967	1
		0.530249	0.412811	0.0569395	1		0.46522	0.455846	0.0789344	1
		0.572174	0.387826	0.04	1		0.412268	0.493581	0.0941512	1
		0.548105	0.402332	0.0495627	1		0.355058	0.478609	0.166333	1
		0.435075	0.432836	0.13209	1		0.421535	0.446735	0.13173	1
		0.331779	0.484577	0.183644	1		0.464543	0.463515	0.0719424	1
		0.485714	0.438095	0.0761905	1		0.543379	0.412481	0.04414	1
		0.389111	0.446054	0.164835	1		0.291357	0.500587	0.208056	1
		0.40411	0.455251	0.140639	1
		0.405616	0.391576	0.202808	1
		0.376353	0.39592	0.227727	1
		0.361505	0.456817	0.181678	1
		0.365587	0.485065	0.149348	1
		0.429309	0.409701	0.160991	1
		0.340807	0.487294	0.171898	1
		FLS2S938D
		CK					flg22
		0-1S	1-4S	大于4S	Sum		0-1S	1-4S	大于4S	Sum
		0.480061	0.464724	0.0552147	1		0.698113	0.264151	0.0377358	1
		0.506186	0.44433	0.0494845	1		0.660194	0.31068	0.0291262	1
		0.539424	0.413016	0.0475594	1		0.578947	0.365231	0.0558214	1
		0.440389	0.479319	0.080292	1		0.54065	0.394309	0.0650407	1
		0.376217	0.494072	0.129712	1		0.562674	0.387187	0.0501393	1
		0.309033	0.527281	0.163686	1		0.649718	0.302663	0.047619	1
		0.414561	0.472924	0.112515	1		0.521528	0.403355	0.0751165	1
		0.449401	0.464048	0.0865513	1		0.500416	0.421797	0.077787	1
		0.493426	0.437742	0.0688322	1		0.493639	0.422941	0.0834202	1
		0.445146	0.450316	0.104538	1		0.544385	0.394847	0.0607673	1
		0.466899	0.458188	0.0749129	1		0.490272	0.42607	0.0836576	1
		0.47482	0.441547	0.0836331	1		0.74359	0.205128	0.0512821	1
		0.471204	0.458115	0.0706806	1		0.420779	0.501299	0.0779221	1
							0.582418	0.335165	0.0824176	1
							0.556667	0.38	0.0633333	1
