# Supplementary material for: Single-molecule analysis reveals the phosphorylation of FLS2 governs its spatiotemporal dynamics and immunity
Source: eLife journal article supplement (doi:10.7554/elife.91072), 2023-10-17
Supplement: fig2-data2 [file Figure2B---SourceData-Pearson correlation coefficient.xlsx]

## Sheet: Sheet1
								FLS2-BAK1-CK	FLS2-BAK1-FLG22		FLS2S938A-BAK1-CK	FLS2S938A-BAK1-FLG22		FLS2S938D-BAK1-CK	FLS2S938D-BAK1-FLG22
								0.248967	0.228752		0.200535	0.209819		0.261269	0.235794
								0.23485	0.216038		0.229634	0.278987		0.234084	0.263693
								0.201431	0.200373		0.200293	0.259973		0.276322	0.269844
								0.219679	0.276318		0.223536	0.253522		0.262052	0.28866
								0.287496	0.337694			0.25385		0.200803	0.271098
								0.143118	0.309693			0.207143		0.272541	0.253804
								0.213769	0.23593			0.251998		0.189296	0.332492
								0.282743	0.305333			0.319632		0.186679	0.250256
								0.124237	0.218924			0.259479			0.306405
								0.141287	0.218924			0.253616			0.261351
								0.246024	0.329386			0.273167
								0.281481				0.232952
								0.203391				0.271817
								0.19835				0.304243
								0.263992				0.276309
								0.276282				0.204443
								0.148058				0.26799
								0.222456				0.248466
								0.296524				0.265336
								0.229273				0.273683
								0.212191
