# Supplementary material for: Single-molecule analysis reveals the phosphorylation of FLS2 governs its spatiotemporal dynamics and immunity
Source: eLife journal article supplement (doi:10.7554/elife.91072), 2023-10-17
Supplement: fig2-data3 [file Figure2C---SourceData-Mean protein proximity indexes.xlsx]

## Sheet: Sheet1
								FLS2-BAK1-CK	FLS2-BAK1-FLG22		FLS2S938A-BAK1-CK	FLS2S938A-BAK1-FLG22		FLS2S938D-BAK1-CK	FLS2S938D-BAK1-FLG22
								0.0911	0.233		0.0951	0.133		0.0875	0.219
								0.0558	0.177		0.0958	0.135		0.0855	0.119
								0.0947	0.116		0.0627	0.102		0.0786	0.211
								0.0616	0.113		0.0864			0.0677
								0.0774	0.133
								0.0596
