# Supplementary material for: Single-molecule analysis reveals the phosphorylation of FLS2 governs its spatiotemporal dynamics and immunity
Source: eLife journal article supplement (doi:10.7554/elife.91072), 2023-10-17
Supplement: fig2-data5 [file Figure2G---SourceData-FLIM-FRET.xlsx]

## Sheet: Sheet1
						GFP		FLS2-AtRem1.3-CK	FLS2-AtRem1.3-FLG22		FLS2S938A-AtRem1.3-CK	FLS2S938A-AtRem1.3-FLG22		FLS2S938D-AtRem1.3-CK	FLS2S938D-AtRem1.3-FLG22
						2.63		2.51	2.4		2.54	2.46		2.51	2.44
						2.61		2.48	2.4		2.51	2.51		2.53	2.35
						2.6		2.56	2.39		2.49	2.47		2.5	2.39
						2.63		2.55	2.4		2.55	2.5		2.48	2.4
						2.58		2.51	2.459		2.49	2.52		2.52	2.36
						2.6		2.48	2.36		2.53	2.47		2.43	2.36
						2.62		2.52	2.36		2.49	2.44		2.53	2.36
						2.58		2.54	2.41		2.56	2.49		2.48	2.34
						2.58			2.38		2.5	2.48		2.47	2.38
									2.37			2.52		2.45	2.399
									2.3			2.54			2.39
									2.35
									2.4
