# Supplementary material for: Single-molecule analysis reveals the phosphorylation of FLS2 governs its spatiotemporal dynamics and immunity
Source: eLife journal article supplement (doi:10.7554/elife.91072), 2023-10-17
Supplement: fig2-data6 [file Figure2I---SourceData-Pearson correlation coefficient.xlsx]

## Sheet: Sheet1
						FLS2	CK	0.1913	0.2754	0.2867	0.3077	0.3446	0.3766	0.2707	0.359	0.2573	0.3643	0.3034	0.3562	0.2856	0.2011	0.2207	0.2359	0.2032	0.2952	0.2196	0.2556	0.1524	0.167	0.1545	0.2273	0.1824	0.1836		0.2689	0.185	0.3081	0.1875	0.292	0.2849	0.2829	0.2311	0.245	0.313	0.3163	0.3073	0.253	0.3201	0.2439
							flg22	0.4303	0.2489	0.2511	0.3145	0.2976	0.3055	0.3346	0.3157	0.238	0.3006	0.2497	0.2346	0.4354	0.262		0.3476	0.4035	0.2904	0.2523	0.2584	0.3392	0.3176	0.2747	0.2815	0.2594	0.2619	0.259	0.3198	0.3178	0.3755	0.2988	0.3557	0.2988	0.2542	0.3277	0.2894	0.3917	0.3323	0.3434	0.3069	0.3418	0.2942
						FLS2S938A	CK	0.2979	0.2788	0.3019	0.258	0.2913	0.3109	0.3191	0.3	0.2717	0.29	0.2447	0.2839	0.3028	0.3169	0.2979	0.2788	0.3019	0.258	0.2913	0.3	0.2717	0.29	0.2447	0.2839	0.3028	0.3169
							flg22	0.3701	0.2198	0.2959	0.2174	0.276	0.3206	0.2682	0.3881	0.2284	0.2614	0.3056	0.244	0.3259	0.2883	0.3171	0.3837	0.3691	0.2856	0.258	0.2739	0.3701	0.2198	0.2959	0.2174	0.276	0.3206	0.2682	0.3881	0.2284	0.2614	0.3056	0.244	0.3259	0.2883	0.3171	0.3837	0.3691	0.2856	0.258	0.2739
						FLS2S938D	CK	0.3351	0.3003	0.279	0.3053	0.2444	0.3031	0.3139	0.3446	0.3912	0.3819	0.312	0.297	0.2397	0.2851	0.3346	0.3262	0.3125	0.3713	0.3105	0.3042	0.3381	0.3903	0.2632	0.3509	0.3617	0.2614	0.2834	0.3789
							flg22	0.3404	0.2852	0.3236	0.2762	0.3273	0.3424	0.2991	0.3499	0.375	0.3103	0.3601	0.3773	0.3783	0.2723	0.3862	0.3435	0.3936	0.3757	0.3364	0.3387	0.348	0.3719	0.3499	0.2932	0.4682	0.3332	0.3531	0.2826	0.3625	0.2448	0.4543	0.3967	0.4156	0.3705	0.2775	0.2914	0.3074	0.2601
[truncated: 20 more columns]
