# Supplementary material for: Single-molecule analysis reveals the phosphorylation of FLS2 governs its spatiotemporal dynamics and immunity
Source: eLife journal article supplement (doi:10.7554/elife.91072), 2023-10-17
Supplement: fig3-data4 [file Figure3D---Density.xlsx]

## Sheet: Sheet1
FLS2	CK	7.423	5.878	8.158	9.327	6.079	7.06	8.42	9.773	6.319	5.856	6.494	11.953	9.621	9.426	5.891	9.905	6.974	6.602	7.666	6.547	5.834	6.61	6.509	5.932	9.005	8.412	8.468	5.751	9.319	10.621	10.852	9.579	8.42	10.411	10.19	9.8	7.332	11.578	7.997	11.322	8.153	9.833	9.889	8.88	7.741
	flg22	6.745	5.879	7.015	7.225	5.737	5.791	6.309	6.926	5.521	6.754	6.907	7.108	7.266	6.861	6.151	7.718	6.057	7.858	7.959	5.664	6.548	7.218	7.963	6.848
FLS2S938A	CK	8.75	7.284	6.233	7.504	9.658	8.606	7.822	6.946	6.626	7.928	9.512	6.409	8.731	7.301	7.874	6.57	7.889	7.753	9.613	7.842	10.701	10.567	9.749	8.797	8.665	8.955	10.405
	flg22	7.841	6.451	9.939	8.124	10.4	8.637	9.526	7.795	8.496	6.571	5.884	7.584	5.403	5.526	9.855	7.43	9.4	8.595	6.146	6.29	6.183	9.643	6.601	9.377	11.096	9.775	8.277	6.784	6.784	7.795	8.518
FLS2S938D	CK	8.087	9.416	7.824	7.447	9.071	8.036	9.782	9.936	9.351	9.758	9.159	8.904	9.541	7.927	8.79	8.33	8.95	9.799
	flg22	7.33	7.779	7.255	5.923	7.742	6.998	5.522	7.106	5.649	5.144	8.151	6.709	5.993	4.277	6.527
