# Supplementary material for: Single-molecule analysis reveals the phosphorylation of FLS2 governs its spatiotemporal dynamics and immunity
Source: eLife journal article supplement (doi:10.7554/elife.91072), 2023-10-17
Supplement: fig3-figsupp1-data1 [file Figure 3 - figure supplement 3A---SourceData .xlsx]

## Sheet: Sheet1
FLS2	CK	2	2	1	2	1	1	2	2	1	3	1	2	1	2	1	2	1	1	2
	flg22	1	1	3	1	2	2	2	1	1
FLS2S938A	CK	1	1	1	1	1	2	2	1	2	1	1	2	1	1	2	2	1	2	2	1	1	1	1	2	1	3	2	1
	flg22	1	1	2	1	1	2	1	2	3
FLS2S938D	CK	2	2	1	3	2	1	2	1	1	2	1	1	2	1	1	3	1	2	1	1	1
	flg22	1	2	2	1	1	1	3
