# Supplementary material for: Single-molecule analysis reveals the phosphorylation of FLS2 governs its spatiotemporal dynamics and immunity
Source: eLife journal article supplement (doi:10.7554/elife.91072), 2023-10-17
Supplement: fig3-figsupp1-data1 [file Figure 3 - figure supplement 3B---SourceData .xlsx]

## Sheet: Sheet1
FLS2	CK	2.39	2.09	2.69	3.44	3.76	4.12	1.84	4.31	3.95	3.86	3.04	2.73
	flg22	3.44	3.22	2.53	3.05	2.49	2.58	3.4	2.53
FLS2S938A	CK	4.32	3.89	2.53	2.16	2.56	2.33	1.7	2.83	2.95
	flg22	2.73	1.33	1.79	3.17	3.06	2.54	3.29	4.48	2.97	3.76
FLS2S938D	CK	2.53	3.29	2.64	2.89	2.09	2.4	3.32	3.08
	flg22	6.69	4.67	4.76	3.24	4.78	4.15	3.55	2.29	2.16	2.96	3.13	3.76	6.8	6.84	5.77	6.35	6.22	4.56	4.08	3.22	4.3	1.83
