# Supplementary material for: Single-molecule analysis reveals the phosphorylation of FLS2 governs its spatiotemporal dynamics and immunity
Source: eLife journal article supplement (doi:10.7554/elife.91072), 2023-10-17
Supplement: fig3-figsupp1-data1 [file Figure 3 - figure supplement 3C---SourceData .xlsx]

## Sheet: Sheet1
FLS2	CK	0.638359	0.612603	0.544905	0.632389	0.655539	0.540362
	flg22	0.730735	0.699438	0.776741	0.739338	0.763137
FLS2S938A	CK	0.581119	0.625989	0.602579	0.602979	0.669931
	flg22	0.597615	0.566713	0.603759	0.600122	0.600122
FLS2S938D	CK	0.619015	0.616979	0.552795
	flg22	0.836257	0.745106	0.820272	0.706847	0.723124	0.692693	0.739757
