# Supplementary material for: Single-molecule analysis reveals the phosphorylation of FLS2 governs its spatiotemporal dynamics and immunity
Source: eLife journal article supplement (doi:10.7554/elife.91072), 2023-10-17
Supplement: fig3-figsupp4-data1 [file Figure 3 - figure supplement 4---SourceData .xlsx]

## Sheet: Sheet1
FLS2	flg22-0min	0.924705	0.889771	0.867518	0.863101	0.849525	0.91504	0.824933	0.803775	0.796291
FLS2S938A	flg22-0min	0.791951	0.782564	0.860831	0.840566	0.898577
FLS2S938D	flg22-0min	0.933022	0.890659	0.90592	0.907722	0.935928	0.890659	0.90592	0.907722	0.889771	0.867518
FLS2	flg22-15min	0.909818	0.934727	0.879971	0.955423	0.919246
FLS2S938A	flg22-15min	0.870489	0.892379	0.878911	0.756118	0.887294
FLS2S938D	flg22-15min	0.94382	0.967926	0.94712	0.978896	0.945024	0.959928
FLS2	flg22-30min	0.893615	0.94478	0.974071	0.969466	0.938943	0.9749	0.912063
FLS2S938A	flg22-30min	0.867446	0.843774	0.853436	0.80566	0.898577
FLS2S938D	flg22-30min	0.990599	1.00402	0.978636	0.993278	1.02258	1.01399	1.01549
FLS2	flg22-60min	0.979895	0.967738	0.932721	0.917617	0.954824	0.921283	0.911993	0.938444	0.957041
FLS2S938A	flg22-60min	0.920207	0.872287	0.918175	0.940811	0.942699
FLS2S938D	flg22-60min	0.994106	1.02016	1.01097	1.00291	0.985618	0.994695	0.982204	0.994379
