# Supplementary material for: Single-molecule analysis reveals the phosphorylation of FLS2 governs its spatiotemporal dynamics and immunity
Source: eLife journal article supplement (doi:10.7554/elife.91072), 2023-10-17
Supplement: fig4-data2 [file Figure4C---Hypocotyl length.xlsx]

## Sheet: Sheet1
FLS2	CK	0.601	0.571	0.634	0.648	0.586	0.548	0.588	0.696	0.611	0.553	0.626	0.57	0.569
	flg22	0.451	0.426	0.446	0.473	0.392	0.447	0.521	0.449	0.528	0.408	0.411	0.434	0.428
FLS2S938A	CK	0.647	0.64	0.647	0.702	0.636	0.623	0.662	0.613	0.6	0.587	0.604	0.61	0.61
	flg22	0.65	0.635	0.543	0.523	0.547	0.676	0.598	0.632	0.563	0.65	0.615	0.639	0.605
FLS2S938D	CK	0.644	0.727	0.746	0.642	0.694	0.695	0.704	0.677	0.735	0.646	0.698	0.69	0.636
	flg22	0.494	0.487	0.426	0.462	0.359	0.336	0.409	0.377	0.485	0.38	0.436	0.395	0.424
