# Supplementary material for: Single-molecule analysis reveals the phosphorylation of FLS2 governs its spatiotemporal dynamics and immunity
Source: eLife journal article supplement (doi:10.7554/elife.91072), 2023-10-17
Supplement: fig4-data3 [file Figure4D-F--mRNA expression level.xlsx]

## Sheet: Sheet1
FRK1	FLS2-ck	*	1	0.16691
FRK1	FLS2-flg22		18.7842	0.93934
FRK1	FLS2S938A-CK		1	0.0782576
FRK1	FLS2S938A-flg22		2.12251	0.0626501
FRK1	FLS2S938D-CK		1	0.0561889
FRK1	FLS2S938D-flg22		152.903	7.66397
WRKY33	FLS2-ck	*	1	0.30017
WRKY33	FLS2-flg22		12.5354	4.01028
WRKY33	FLS2S938A-CK		1	0.326726
WRKY33	FLS2S938A-flg22		4.53354	1.48029
WRKY33	FLS2S938D-CK		1	0.531389
WRKY33	FLS2S938D-flg22		13.1341	4.00772
CYP81	FLS2-CK	*	1	0.06111
CYP81	FLS2-flg22		7.23185	0.37651
CYP81	FLS2S938A-CK		1	0.0343672
CYP81	FLS2S938A-flg22		5.50995	0.220293
CYP81	FLS2S938D-CK		1	0.0688047
CYP81	FLS2S938D-flg22		15.7739	0.882472
