# Supplementary material for: Single-molecule analysis reveals the phosphorylation of FLS2 governs its spatiotemporal dynamics and immunity
Source: eLife journal article supplement (doi:10.7554/elife.91072), 2023-10-17
Supplement: fig4-figsupp2-data1 [file Figure 4 - figure supplement 2-source data .xlsx]

## Sheet: Sheet1
FLS2	CK	6.70534e-06	1.02e-05	7.94299e-06	9.56e-06	7.19e-06	5.63e-06	2.65e-06
	flg22	3.86e-05	3.62e-05	9.72e-06	4.31e-05	4.2e-05	1.33e-05	4.04e-05	3.99e-05	1.7266e-05	3.5e-05	3.58e-05	3.75e-05	3.88e-05	3.76e-05
FLS2S938A	CK	0	0	3.02576e-06	3.84e-06	6.98e-06	2.17e-06	4.04e-06	6.33e-06	1.67e-06	2.49e-06
	flg22	2.45e-05	2e-05	2.48e-05	1.43e-05	2.21e-05	1.61e-05	1.31e-05	2.33e-05	2.58465e-05	2.51e-05	2.59e-05	2.3e-05
FLS2S938D	CK	1.53457e-05	9.83e-06	2.10163e-05	1.42e-05	1.64e-05	2.18e-05	1.29e-05	9.64e-06	1.22e-05	2.03e-05
	flg22	6.01e-05	2.8e-05	2.54e-05	4.25e-05	6.51e-05	9.97e-05	0.000122	0.000106	7.98513e-05	6.43e-05	7.48e-05	7.85e-05	7.44e-05
