# Supplementary material for: Single-molecule analysis reveals the phosphorylation of FLS2 governs its spatiotemporal dynamics and immunity
Source: eLife. 2024 Jul 24;12:RP91072. doi: 10.7554/eLife.91072 (PMC11268883; doi:10.7554/eLife.91072)
Supplement: Figure 1—source data 1. [file elife-91072-fig1-data1.xlsx]

## Sheet: Sheet1
	CK	short-range	0.516606	0.492175	0.419999	0.340698	0.31701	0.409295	0.36154	0.486166	0.451971	0.524631	0.458508	0.425125	0.503729
FLS2		long-range	0.483394	0.507825	0.580001	0.659302	0.68299	0.590705	0.63846	0.513834	0.548029	0.475369	0.541492	0.574875	0.496271
		sun	1	1	1	1	1	1	1	1	1	1	1	1	1
	flg22	short-range	0.350471	0.355521	0.251294	0.201304	0.338366
		long-range	0.649529	0.644479	0.748706	0.798696	0.661634
		sun	1	1	1	1	1
	CK	short-range	0.476194	0.412617	0.501984	0.524696	0.419057	0.592258	0.552597	0.494847	0.392899	0.484299	0.415999	0.378908	0.42985	0.546253	0.482065	0.466799
FLS2S938A		long-range	0.523806	0.587383	0.498016	0.475304	0.580943	0.407742	0.447403	0.505153	0.607101	0.515701	0.584001	0.621092	0.57015	0.453747	0.517935	0.533201
		sun	1	1	1	1	1	1	1	1	1	1	1	1	1	1	1	1
	flg22	short-range	0.450009	0.488779	0.494157	0.490311	0.508329	0.534529	0.429195	0.534972	0.442541	0.536608	0.479186	0.510124	0.516062	0.374995
		long-range	0.549991	0.511221	0.505843	0.509689	0.491671	0.465471	0.570805	0.465028	0.557459	0.463392	0.520814	0.489876	0.483938	0.625005
		sun	1	1	1	1	1	1	1	1	1	1	1	1	1	1
	CK	short-range	0.375255	0.38378	0.420562	0.403743	0.321239	0.476318	0.471015	0.585079	0.436807	0.556229	0.42139	0.423981	0.523561	0.470613
FLS2S938D		long-range	0.624745	0.61622	0.579438	0.596257	0.678761	0.523682	0.528985	0.414921	0.563193	0.443771	0.57861	0.576019	0.476439	0.529387
		sun	1	1	1	1	1	1	1	1	1	1	1	1	1	1
	flg22	short-range	0.321949	0.292837	0.318885	0.410138	0.406531	0.310334	0.372222	0.326363	0.290972	0.281204
		long-range	0.678051	0.707163	0.681115	0.589862	0.593469	0.689666	0.627778	0.673637	0.709028	0.718796
		sun	1	1	1	1	1	1	1	1	1	1
