# Supplementary material for: Single-molecule analysis reveals the phosphorylation of FLS2 governs its spatiotemporal dynamics and immunity
Source: eLife. 2024 Jul 24;12:RP91072. doi: 10.7554/eLife.91072 (PMC11268883; doi:10.7554/eLife.91072)
Supplement: Figure 3—source data 3. [file elife-91072-fig3-data3.xlsx]

## Sheet: Sheet1
					FLS2	0min	15min	30min	60min
							42	63	78
							45	68	82
							39	70	89
							42	67	83
					FLS2S938A	0min	15min	30min	60min
							5	8	13
							3	5	10
							5	10	12
					FLS2S938D	0min	15min	30min	60min
							37	60	88
							40	63	89
							39	68	80
